# Supplementary material
Source: publisher figshare collection journal article supplement (https://acs.figshare.com/ndownloader/files/4112908)
Supplement: Supplementary file 1 [file 4112908]

**Supporting Information for**  
**Thermoplastic Elastomers Derived from Menthide and Tulipalin A**

Jihoon Shin, Youngmin Lee, William B. Tolman<sup>\*</sup>, Marc A. Hillmyer<sup>\*</sup>

Department of Chemistry and Center for Sustainable Polymers,  
University of Minnesota, 207 Pleasant St SE, Minneapolis, MN 55455-4031

<sup>\*</sup> Corresponding authors. E-mail: wtolman@umn.edu; hillmyer@umn.edu

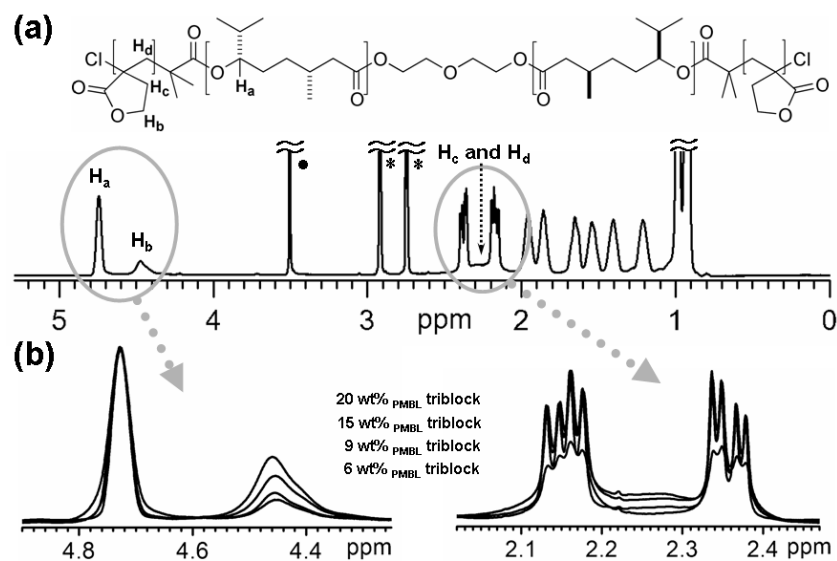

**Figure S1.**  $^1\text{H}$  NMR spectra for (a) PMML-PM-PMBL(5-100-5); (b) overlapped  $\gamma$ -methylene ( $\text{H}_b$ ) and  $\beta$ -methylene ( $\text{H}_c$ ) protons in PMBL units, and  $\beta'$ -methylene protons ( $\text{H}_d$ ) in the backbone for 6, 9, 15, and 20 wt% PMBL triblocks. Asterisks show resonances from DMF- $d_7$ .

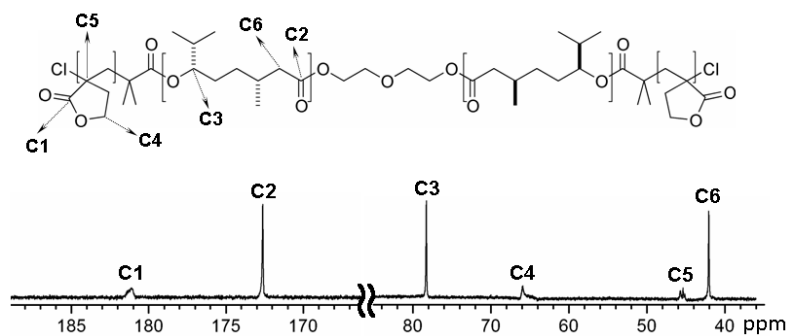

**Figure S2.** Expanded region of the  $^{13}\text{C}\{^1\text{H}\}$  NMR spectrum (125 MHz,  $\text{DMF-}d_7$ ) of PMBL-PM-PMBL(13-100-13) after precipitation.

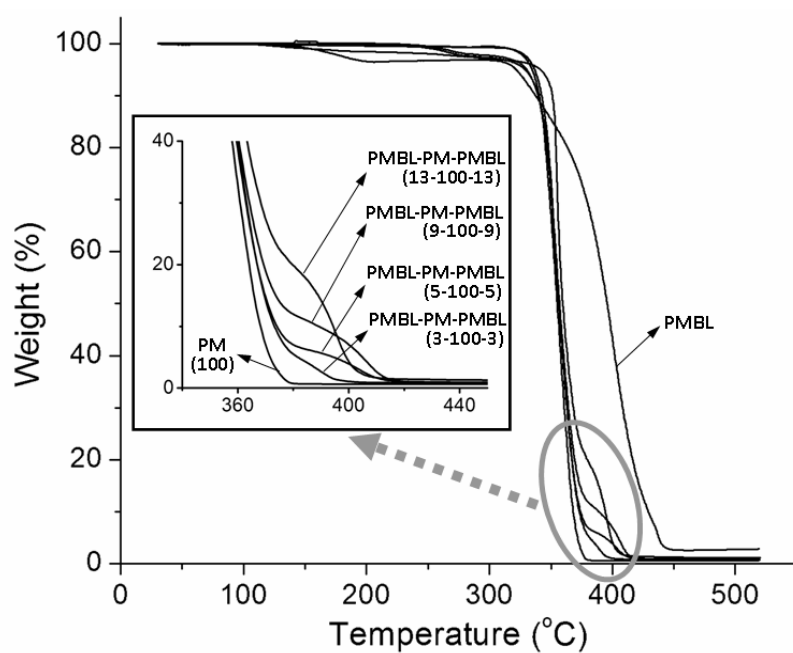

**Figure S3.** TGA analysis for PMBL, PM, and PMBP-PM-PMBL triblock copolymers.

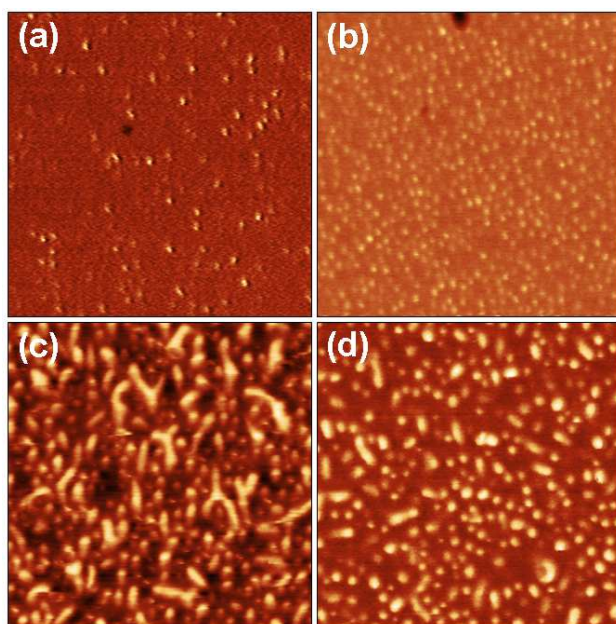

**Figure S4.** AFM images for (a) PMBL-PM-PML (3-100-3), (b) PMBL-PM-PMBL(5-100-5), (c) PMBL-PM-PMBL(9-100-9), and (d) PMBL-PM-PMBL(13-100-13) after annealing at 200 °C for 3 days. Image size is  $1\ \mu\text{m} \times 1\ \mu\text{m}$ .
